# Supplementary material for: Stable Isotope Labeling Highlights Enhanced Fatty Acid and Lipid Metabolism in Human Acute Myeloid Leukemia
Source: PubMed Central journal article supplement (PMC6274868; doi:10.3390/ijms19113325), 2018-10-25

Supplementary

## Stable Isotope Labeling Highlights Enhanced Fatty Acid and Lipid Metabolism in Human Acute Myeloid Leukemia

Lucille STUANI<sup>1,2</sup>, Fabien RIOLS<sup>3</sup>, Pierre Millard<sup>5</sup>, Marie SABATIER<sup>1,2</sup>, Aurélie BATUT<sup>3</sup>, Estelle SALAND<sup>1,2</sup>, Fanny VIARS<sup>3</sup>, Laure Tonini<sup>2,4</sup>, Sonia Zaghdoudi<sup>1,2</sup>, Laetitia K. Linares<sup>6</sup>, Jean-Charles PORTAIS<sup>2,7</sup>, Jean-Emmanuel SARRY<sup>1,2</sup> and Justine BERTRAND-MICHEL<sup>2,3,\*</sup>

Supplementary Table S1A. proteomics signature UP IDH R132H.

| GO-Term                          | GO-Term id | P-value  | # Genes (observed) | # Genes (expected) | # Genes (total) | List of observed genes                                                       |
|----------------------------------|------------|----------|--------------------|--------------------|-----------------|------------------------------------------------------------------------------|
| cholesterol biosynthetic process | GO:0006695 | 4,39E-03 | 3                  | 0,330522766        | 49              | IDI1, LSS, EBP                                                               |
| sterol biosynthetic process      | GO:0016126 | 5,77E-03 | 3                  | 0,364249578        | 54              | IDI1, LSS, EBP                                                               |
| fatty acid beta-oxidation        | GO:0006635 | 9,64E-03 | 3                  | 0,438448567        | 65              | ACOX2, HSD17B4, ACOX1                                                        |
| steroid metabolic process        | GO:0008202 | 8,37E-03 | 6                  | 1,753794266        | 260             | IDI1, ACOX2, ACBD3, LSS, EBP, HSD17B4                                        |
| lipid biosynthetic process       | GO:0008610 | 7,08E-04 | 12                 | 4,033726813        | 598             | NANS, IDI1, ACOX2, ACBD3, IDH1, LSS, LTA4H, EBP, PCYT2, IMPA1, HSD17B4, CBR1 |

**Supplementary Table S1B.** List of protein UP IDH R132H.

|           | <b>PG Gene</b> | <b>PG Protein Descriptions</b>                                                                                                                                                                                                                                                                                                                                                                                                                                                                                                                                                                                                                                                                              |
|-----------|----------------|-------------------------------------------------------------------------------------------------------------------------------------------------------------------------------------------------------------------------------------------------------------------------------------------------------------------------------------------------------------------------------------------------------------------------------------------------------------------------------------------------------------------------------------------------------------------------------------------------------------------------------------------------------------------------------------------------------------|
| PPP2R2A   | PPP2R2D        | Serine/threonine-protein phosphatase 2A 55 kDa regulatory subunit B alpha isoform,Serine/threonine-protein phosphatase 2A 55 kDa regulatory subunit B alpha isoform,Serine/threonine-protein phosphatase 2A 55 kDa regulatory subunit B alpha isoform,Serine/threonine-protein phosphatase 2A 55 kDa regulatory subunit B alpha isoform,Serine/threonine-protein phosphatase 2A 55 kDa regulatory subunit B alpha isoform;Serine/threonine-protein phosphatase 2A 55 kDa regulatory subunit B,Serine/threonine-protein phosphatase 2A 55 kDa regulatory subunit B,Serine/threonine-protein phosphatase 2A 55 kDa regulatory subunit B                                                                       |
| HIBADH    |                | 3-hydroxyisobutyrate dehydrogenase, mitochondrial,3-hydroxyisobutyrate dehydrogenase, mitochondrial;3-hydroxyisobutyrate dehydrogenase                                                                                                                                                                                                                                                                                                                                                                                                                                                                                                                                                                      |
| ACOX1     | ACOX2          | Acyl-coenzyme A oxidase                                                                                                                                                                                                                                                                                                                                                                                                                                                                                                                                                                                                                                                                                     |
| AAAS      |                | Aladin,Aladin;Achalasia, adrenocortical insufficiency, alacrimia (Allgrove, triple-A) variant (Fragment)                                                                                                                                                                                                                                                                                                                                                                                                                                                                                                                                                                                                    |
| ADD3      |                | Gamma-adducin,Gamma-adducin;Adducin 3 (Gamma), isoform CRA_a;Adducin 3 isoform a variant (Fragment),Adducin 3 isoform a variant (Fragment)                                                                                                                                                                                                                                                                                                                                                                                                                                                                                                                                                                  |
| AFG3L2    |                | AFG3-like protein 2;AFG3 ATPase family gene 3-like 2 (Yeast), isoform CRA_a (Fragment);Similar to AFG3 ATPase family gene 3-like 2 (Yeast) (Fragment)                                                                                                                                                                                                                                                                                                                                                                                                                                                                                                                                                       |
| RNPEP     |                | Aminopeptidase B                                                                                                                                                                                                                                                                                                                                                                                                                                                                                                                                                                                                                                                                                            |
| ARID1A    |                | AT-rich interactive domain-containing protein 1A                                                                                                                                                                                                                                                                                                                                                                                                                                                                                                                                                                                                                                                            |
| ARID3A    |                | AT-rich interactive domain-containing protein 3A                                                                                                                                                                                                                                                                                                                                                                                                                                                                                                                                                                                                                                                            |
| HEL-S-68p | HEL-S-272      | Phosphoglycerate kinase                                                                                                                                                                                                                                                                                                                                                                                                                                                                                                                                                                                                                                                                                     |
| MROH7     |                | cDNA FLJ58649;Maestro heat-like repeat-containing protein family member 7,Maestro heat-like repeat-containing protein family member 7                                                                                                                                                                                                                                                                                                                                                                                   |
| NA        |                | cDNA FLJ54032, highly similar to Elongation factor 1-alpha 1                                                                                                                                                                                                                                                                                                                                                                                                                                                                                                                                                                                                                                                |
| BASP1     |                | Brain acid soluble protein 1                                                                                                                                                                                                                                                                                                                                                                                                                                                                                                                                                                                                                                                                                |
| BAZ1A     |                | Bromodomain adjacent to zinc finger domain protein 1A;Bromodomain adjacent to zinc finger domain, 1A, isoform CRA_c                                                                                                                                                                                                                                                                                                                                                                                                                                                                                                                                                                                         |
| BOD1L1    |                | Biorientation of chromosomes in cell division protein 1-like 1                                                                                                                                                                                                                                                                                                                                                                                                                                                                                                                                                                                                                                              |
| BRD4      |                | Bromodomain-containing protein 4;Bromodomain containing 4, isoform CRA_b                                                                                                                                                                                                                                                                                                                                                                                                                                                                                                                                                                                                                                    |
| BROX      |                | BRO1 domain-containing protein BROX,BRO1 domain-containing protein BROX;cDNA FLJ50123                                                                                                                                                                                                                                                                                                                                                                                                                                                                                                                                                                                                                       |
| C1orf234  |                | Uncharacterized protein C1orf234                                                                                                                                                                                                                                                                                                                                                                                                                                                                                                                                                                                                                                                                            |
| CA2       |                | Carbonic anhydrase 2,Carbonic anhydrase 2,Carbonic anhydrase 2;Epididymis luminal protein 76                                                                                                                                                                                                                                                                                                                                                                                                                                                                                                                                                                                                                |
| CAPN2     |                | Calpain-2 catalytic subunit;cDNA FLJ39928 fis, clone SPLN2021273, highly similar to Calpain-2 catalytic subunit (EC 3.4.22.53);Calpain 2, large [catalytic] subunit variant (Fragment);cDNA FLJ58224, highly similar to Calpain-2 catalytic subunit (EC 3.4.22.53);cDNA FLJ42761 fis, clone BRAWH3002574, highly similar to Calpain 2, large;cDNA, FLJ96158, highly similar to Homo sapiens calpain 2, (m/II) large subunit (CAPN2), mRNA;cDNA FLJ58517, highly similar to Calpain-2 catalytic subunit (EC 3.4.22.53)                                                                                                                                                                                       |
| CTSB      |                | Cathepsin B,Cathepsin B;Cathepsin B, isoform CRA_a;cDNA FLJ78235;cDNA FLJ58073, moderately similar to Cathepsin B (EC 3.4.22.1);Cathepsin B (Fragment),Cathepsin B (Fragment);cDNA FLJ59133, highly similar to Cathepsin B (EC 3.4.22.1);cDNA FLJ40065 fis, clone TESOP2000400, highly similar to CATHEPSIN B (EC 3.4.22.1) |
| CTSD      | HEL-S-130P     | Cathepsin D,Cathepsin D;Cathepsin D (Lysosomal aspartyl peptidase), isoform CRA_a;Cathepsin D (Fragment),Cathepsin D (Fragment),Cathepsin D (Fragment)                                                                                                                                                                                                                                                                                                                                                                                                                                                                                                                                                      |
| CTSZ      |                | Cathepsin Z                                                                                                                                                                                                                                                                                                                                                                                                                                                                                                                                                                                                                                                                                                 |
| CPD       |                | Carboxypeptidase D                                                                                                                                                                                                                                                                                                                                                                                                                                                                                                                                                                                                                                                                                          |
| CBR1      |                | Carbonyl reductase [NADPH] 1                                                                                                                                                                                                                                                                                                                                                                                                                                                                                                                                                                                                                                                                                |
| CCAR1     |                | Cell division cycle and apoptosis regulator protein 1                                                                                                                                                                                                                                                                                                                                                                                                                                                                                                                                                                                                                                                       |
| CHD1L     |                | Chromodomain-helicase-DNA-binding protein 1-like,Chromodomain-helicase-DNA-binding protein 1-like,Chromodomain-helicase-                                                                                                                                                                                                                                                                                                                                                                                                                                                                                                                                                                                    |

|         |                                         |                                                                                                                                                                                                                                                                                                                                                                                                                                                                                                                                   |
|---------|-----------------------------------------|-----------------------------------------------------------------------------------------------------------------------------------------------------------------------------------------------------------------------------------------------------------------------------------------------------------------------------------------------------------------------------------------------------------------------------------------------------------------------------------------------------------------------------------|
|         |                                         | DNA-binding protein 1-like,Chromodomain-helicase-DNA-binding protein 1-like,Chromodomain-helicase-DNA-binding protein 1-like;Chromodomain helicase DNA binding protein 1-like isoform A (Fragment)                                                                                                                                                                                                                                                                                                                                |
| CHD5    |                                         | Chromodomain-helicase-DNA-binding protein 5                                                                                                                                                                                                                                                                                                                                                                                                                                                                                       |
| CLTCL1  |                                         | Clathrin heavy chain 2                                                                                                                                                                                                                                                                                                                                                                                                                                                                                                            |
| CNOT10  |                                         | CCR4-NOT transcription complex subunit 10,CCR4-NOT transcription complex subunit 10;CCR4-NOT transcription complex subunit 10 (Fragment),CCR4-NOT transcription complex subunit 10 (Fragment),CCR4-NOT transcription complex subunit 10 (Fragment)                                                                                                                                                                                                                                                                                |
| NaN     |                                         | NaN                                                                                                                                                                                                                                                                                                                                                                                                                                                                                                                               |
| NaN     |                                         | NaN                                                                                                                                                                                                                                                                                                                                                                                                                                                                                                                               |
| COPG1   |                                         | Coatomer subunit gamma-1                                                                                                                                                                                                                                                                                                                                                                                                                                                                                                          |
| COPG2   |                                         | Coatomer subunit gamma-2                                                                                                                                                                                                                                                                                                                                                                                                                                                                                                          |
| CAPNS1  |                                         | Calpain small subunit 1,Calpain small subunit 1,Calpain small subunit 1,Calpain small subunit 1,Calpain small subunit 1;Calpain small subunit 1 (Fragment),Calpain small subunit 1 (Fragment)                                                                                                                                                      |
| COPS8   |                                         | COP9 signalosome complex subunit 8,COP9 signalosome complex subunit 8,COP9 signalosome complex subunit 8;COP9 constitutive photomorphogenic homolog subunit 8 (Arabidopsis), isoform CRA_a;cDNA, FLJ93976, highly similar to Homo sapiens COP9 homolog (COP9), mRNA;cDNA FLJ60469, highly similar to COP9 signalosome complex subunit 8                                                                                                                                                                                           |
| ITGB5   | ITGB4; ITGB;<br>ITGB2; ITGB6 ;<br>ITGB3 | Integrin beta                                                                                                                                                                                                                                                                                                                                                                                                                                                                                                                     |
| ASAH1   |                                         | N-acylsphingosine amidohydrolase (Acid ceramidase) 1, isoform CRA_c;N-acylsphingosine amidohydrolase (Acid ceramidase) 1 preproprotein isoform a variant (Fragment);cDNA FLJ77858, highly similar to Homo sapiens N-acylsphingosine amidohydrolase (acid ceramidase) 1 (ASAH1), transcript variant 1, mRNA;cDNA FLJ40980 fis, clone UTERU2014464, highly similar to ACID CERAMIDASE (EC 3.5.1.23)                                                                                                                                 |
| HSD17B4 |                                         | Peroxisomal multifunctional enzyme type 2,Peroxisomal multifunctional enzyme type 2,Peroxisomal multifunctional enzyme type 2,Peroxisomal multifunctional enzyme type 2,Peroxisomal multifunctional enzyme type 2;cDNA, FLJ92803, highly similar to Homo sapiens hydroxysteroid (17-beta) dehydrogenase 4 (HSD17B4), mRNA                                                                                                                                                                                                         |
| DNM1L   |                                         | Dynamin-1-like protein,Dynamin-1-like protein,Dynamin-1-like protein,Dynamin-1-like protein,Dynamin-1-like protein,Dynamin-1-like protein;Dynamin 1-like, isoform CRA_f;Dynamin 1-like, isoform CRA_a;Dynamin 1-like, isoform CRA_c;cDNA FLJ56381, highly similar to Dynamin-1-like protein (EC 3.6.5.5)                                                                                                                                                                                                                          |
| EBP     |                                         | 3-beta-hydroxysteroid-Delta(8),Delta(7)-isomerase;Emopamil binding protein                                                                                                                                                                                                                                                                                                                                                                                                                                                        |
| HADHA   |                                         | Trifunctional enzyme subunit alpha, mitochondrial;Epididymis tissue sperm binding protein Li 14m                                                                                                                                                                                                                                                                                                                                                                                                                                  |
| EIF3M   |                                         | Eukaryotic translation initiation factor 3 subunit M                                                                                                                                                                                                                                                                                                                                                                                                                                                                              |
| ELMOD2  |                                         | ELMO domain-containing protein 2,ELMO domain-containing protein 2;ELMO domain-containing protein 2 (Fragment),ELMO domain-containing protein 2 (Fragment),ELMO domain-containing protein 2 (Fragment)                                                                                                                                                                                                                                                                                                                             |
| LSS     |                                         | Lanosterol synthase;Lanosterol synthase (Fragment),Lanosterol synthase (Fragment),Lanosterol synthase (Fragment),Lanosterol synthase (Fragment);Terpene cyclase/mutase family member                                                                                                                                                                                                                                                                                                                                              |
| GALK1   | HEL-S-19 ;<br>GALK                      | Galactokinase,Galactokinase;Epididymis secretory protein Li 19;Galactokinase (Fragment),Galactokinase (Fragment),Galactokinase (Fragment),Galactokinase (Fragment),Galactokinase (Fragment),Galactokinase (Fragment),Galactokinase (Fragment),Galactokinase (Fragment)                                                                                                                                                                                                                                                            |
| GCC2    |                                         | GRIP and coiled-coil domain-containing protein 2,GRIP and coiled-coil domain-containing protein 2;GRIP and coiled-coil domain-containing protein 2 (Fragment),GRIP and coiled-coil domain-containing protein 2 (Fragment);GRIP and coiled-coil domain containing 2, isoform CRA_a |
| ACBD3   |                                         | Golgi resident protein GCP60;Acyl-Coenzyme A binding domain containing 3, isoform CRA_a                                                                                                                                                                                                                                                                                                                                                                                                                                           |
| GMDS    |                                         | GDP-mannose 4,6 dehydratase;cDNA, FLJ94599, highly similar to Homo sapiens GDP-mannose 4,6-dehydratase (GMDS), mRNA                                                                                                                                                                                                                                                                                                                                                                                                               |
| GNS     |                                         | N-acetylglucosamine-6-sulfatase,N-acetylglucosamine-6-sulfatase;Glucosamine (N-acetyl)-6-sulfatase (Sanfilippo disease IIID), isoform CRA_a;cDNA FLJ75883, highly similar to Homo                                                                                                                                                                                                                                                                                                                                                 |

|          |                        |                                                                                                                                                                                                                                                                                                                                                                                                                                                                                                                                                                                                                                                                                                                                                                                                                                                                                                                                                                                                                                                                                                                                                                                                                                                                                                                                                                                                                                                                                                                                                                                                                                                                                                                                                                                                                                       |
|----------|------------------------|---------------------------------------------------------------------------------------------------------------------------------------------------------------------------------------------------------------------------------------------------------------------------------------------------------------------------------------------------------------------------------------------------------------------------------------------------------------------------------------------------------------------------------------------------------------------------------------------------------------------------------------------------------------------------------------------------------------------------------------------------------------------------------------------------------------------------------------------------------------------------------------------------------------------------------------------------------------------------------------------------------------------------------------------------------------------------------------------------------------------------------------------------------------------------------------------------------------------------------------------------------------------------------------------------------------------------------------------------------------------------------------------------------------------------------------------------------------------------------------------------------------------------------------------------------------------------------------------------------------------------------------------------------------------------------------------------------------------------------------------------------------------------------------------------------------------------------------|
|          |                        | sapiens glucosamine (N-acetyl)-6-sulfatase (Sanfilippo disease IIID) (GNS), mRNA                                                                                                                                                                                                                                                                                                                                                                                                                                                                                                                                                                                                                                                                                                                                                                                                                                                                                                                                                                                                                                                                                                                                                                                                                                                                                                                                                                                                                                                                                                                                                                                                                                                                                                                                                      |
| GRHPR    |                        | Glyoxylate reductase/hydroxypyruvate reductase                                                                                                                                                                                                                                                                                                                                                                                                                                                                                                                                                                                                                                                                                                                                                                                                                                                                                                                                                                                                                                                                                                                                                                                                                                                                                                                                                                                                                                                                                                                                                                                                                                                                                                                                                                                        |
| HSPA5    | HEL-S-89n              | 78 kDa glucose-regulated protein;Epididymis secretory sperm binding protein Li 89n                                                                                                                                                                                                                                                                                                                                                                                                                                                                                                                                                                                                                                                                                                                                                                                                                                                                                                                                                                                                                                                                                                                                                                                                                                                                                                                                                                                                                                                                                                                                                                                                                                                                                                                                                    |
| GSR      |                        | Glutathione reductase, mitochondrial;Epididymis luminal protein 75                                                                                                                                                                                                                                                                                                                                                                                                                                                                                                                                                                                                                                                                                                                                                                                                                                                                                                                                                                                                                                                                                                                                                                                                                                                                                                                                                                                                                                                                                                                                                                                                                                                                                                                                                                    |
| SLC2A14  | SLC2A3                 | Solute carrier family 2, facilitated glucose transporter member 14,Solute carrier family 2, facilitated glucose transporter member 14;Solute carrier family 2, facilitated glucose transporter member 3,Solute carrier family 2, facilitated glucose transporter member 3;cDNA FLJ57557, highly similar to Solute carrier family 2, facilitated glucose transporter member 3;cDNA FLJ58410, highly similar to Solute carrier family 2, facilitated glucosetransporter member 3;Solute carrier family 2 (Facilitated glucose transporter), member 3 variant (Fragment);cDNA FLJ56136, highly similar to Solute carrier family 2, facilitated glucosetransporter member 14                                                                                                                                                                                                                                                                                                                                                                                                                                                                                                                                                                                                                                                                                                                                                                                                                                                                                                                                                                                                                                                                                                                                                              |
| GYS1     |                        | Glycogen [starch] synthase, muscle;Glycogen synthase 1 (Muscle) variant (Fragment);cDNA FLJ76881, highly similar to Homo sapiens glycogen synthase 1 (muscle) (GYS1), mRNA                                                                                                                                                                                                                                                                                                                                                                                                                                                                                                                                                                                                                                                                                                                                                                                                                                                                                                                                                                                                                                                                                                                                                                                                                                                                                                                                                                                                                                                                                                                                                                                                                                                            |
| HMMR     |                        | Hyaluronan mediated motility receptor;HMMR protein (Fragment),HMMR protein (Fragment),HMMR protein (Fragment),HMMR protein (Fragment)                                                                                                                                                                                                                                                                                                                                                                                                                                                                                                                                                                                                                                                                                                                                                                                                                                                                                                                                                                                                                                                                                                                                                                                                                                                                                                                                                                                                                                                                                                                                                                                                                                                                                                 |
| HNRNPCL1 | HNRNPCL3 ;<br>HNRNPCL4 | Heterogeneous nuclear ribonucleoprotein C-like 1;Heterogeneous nuclear ribonucleoprotein C-like 3;Heterogeneous nuclear ribonucleoprotein C-like 4,Heterogeneous nuclear ribonucleoprotein C-like 4;HNRPCL1 protein (Fragment)                                                                                                                                                                                                                                                                                                                                                                                                                                                                                                                                                                                                                                                                                                                                                                                                                                                                                                                                                                                                                                                                                                                                                                                                                                                                                                                                                                                                                                                                                                                                                                                                        |
| HVCN1    |                        | Voltage-gated hydrogen channel 1,Voltage-gated hydrogen channel 1;Hydrogen voltage-gated channel 1 variant 3                                                                                                                                                                                                                                                                                                                                                                                                                                                                                                                                                                                                                                                                                                                                                                                                                                                                                                                                                                                                                                                                                                                                                                                                                                                                                                                                                                                                                                                                                                                                                                                                                                                                                                                          |
| IDI1     |                        | Isopentenyl-diphosphate Delta-isomerase 1                                                                                                                                                                                                                                                                                                                                                                                                                                                                                                                                                                                                                                                                                                                                                                                                                                                                                                                                                                                                                                                                                                                                                                                                                                                                                                                                                                                                                                                                                                                                                                                                                                                                                                                                                                                             |
| IMPA1    |                        | Inositol monophosphatase 1,Inositol monophosphatase 1,Inositol monophosphatase 1,Inositol monophosphatase 1;Inositol(Myo)-1(Or 4)-monophosphatase 1, isoform CRA_a                                                                                                                                                                                                                                                                                                                                                                                                                                                                                                                                                                                                                                                                                                                                                                                                                                                                                                                                                                                                                                                                                                                                                                                                                                                                                                                                                                                                                                                                                                                                                                                                                                                                    |
| IMPA2    |                        | Inositol monophosphatase 2                                                                                                                                                                                                                                                                                                                                                                                                                                                                                                                                                                                                                                                                                                                                                                                                                                                                                                                                                                                                                                                                                                                                                                                                                                                                                                                                                                                                                                                                                                                                                                                                                                                                                                                                                                                                            |
| IQGAP2   |                        | Ras GTPase-activating-like protein IQGAP2,Ras GTPase-activating-like protein IQGAP2,Ras GTPase-activating-like protein IQGAP2,Ras GTPase-activating-like protein IQGAP2;IQ motif containing GTPase activating protein 2, isoform CRA_b;Ras GTPase-activating-like protein IQGAP2 (Fragment),Ras GTPase-activating-like protein IQGAP2 (Fragment),Ras GTPase-activating-like protein IQGAP2 (Fragment),Ras GTPase-activating-like protein IQGAP2 (Fragment),Ras GTPase-activating-like protein IQGAP2 (Fragment)                                                                                                                                                                                                                                                                                                                                                                                                                                                                                                                                                                                                                                                                                                                                                                                                                                                                                                                                                                                                                                                                                                                                                                                                                                                                                                                       |
| ISOC2    |                        | Isochorismatase domain-containing protein 2, mitochondrial;Isochorismatase domain-containing protein 2, mitochondrial (Fragment),Isochorismatase domain-containing protein 2, mitochondrial (Fragment)                                                                                                                                                                                                                                                                                                                                                                                                                                                                                                                                                                                                                                                                                                                                                                                                                                                                                                                                                                                                                                                                                                                                                                                                                                                                                                                                                                                                                                                                                                                                                                                                                                |
| ITGA5    |                        | Integrin alpha-5,Integrin alpha-5;Integrin, alpha 5 (Fibronectin receptor, alpha polypeptide), isoform CRA_b;cDNA, FLJ92752, highly similar to Homo sapiens integrin, alpha 5 (fibronectin receptor, alphapolypeptide) (ITGA5), mRNA;cDNA FLJ77742, highly similar to Homo sapiens integrin, alpha 5 (fibronectin receptor, alpha polypeptide), mRNA                                                                                                                                                                                                                                                                                                                                                                                                                                                                                                                                                                                                                                                                                                                                                                                                                                                                                                                                                                                                                                                                                                                                                                                                                                                                                                                                                                                                                                                                                  |
| KIF1BP   |                        | KIF1-binding protein                                                                                                                                                                                                                                                                                                                                                                                                                                                                                                                                                                                                                                                                                                                                                                                                                                                                                                                                                                                                                                                                                                                                                                                                                                                                                                                                                                                                                                                                                                                                                                                                                                                                                                                                                                                                                  |
| CMPK1    | CMPK                   | UMP-CMP kinase,UMP-CMP kinase,UMP-CMP kinase,UMP-CMP kinase;cDNA FLJ53966, moderately similar to Homo sapiens cytidylate kinase (CMPK), mRNA                                                                                                                                                                                                                                                                                                                                                                                                                                                                                                                                                                                                                                                                                                                                                                                                                                                                                                                                                                                                                                                                                                                                                                                                                                                                                                                                                                                                                                                                                                                                                                                                                                                                                          |
| PRPSAP2  |                        | Phosphoribosyl pyrophosphate synthase-associated protein 2,Phosphoribosyl pyrophosphate synthase-associated protein 2,Phosphoribosyl pyrophosphate synthase-associated protein 2,Phosphoribosyl pyrophosphate synthase-associated protein 2;Phosphoribosyl pyrophosphate synthase-associated protein 2 (Fragment),Phosphoribosyl pyrophosphate synthase-associated protein 2 (Fragment);Phosphoribosyl pyrophosphate synthetase-associated protein 2, isoform CRA_a;cDNA, FLJ93570, highly similar to Homo sapiens phosphoribosyl pyrophosphate synthetase-associated protein 2 (PRPSAP2), mRNA |
| LGALS1   |                        | Galectin-1                                                                                                                                                                                                                                                                                                                                                                                                                                                                                                                                                                                                                                                                                                                                                                                                                                                                                                                                                                                                                                                                                                                                                                                                                                                                                                                                                                                                                                                                                                                                                                                                                                                                                                                                                                                                                            |
| GLO1     | HEL-S-74               | Lactoylglutathione lyase,Lactoylglutathione lyase;Lactoylglutathione lyase (Fragment)                                                                                                                                                                                                                                                                                                                                                                                                                                                                                                                                                                                                                                                                                                                                                                                                                                                                                                                                                                                                                                                                                                                                                                                                                                                                                                                                                                                                                                                                                                                                                                                                                                                                                                                                                 |
| LTA4H    |                        | Leukotriene A-4 hydrolase                                                                                                                                                                                                                                                                                                                                                                                                                                                                                                                                                                                                                                                                                                                                                                                                                                                                                                                                                                                                                                                                                                                                                                                                                                                                                                                                                                                                                                                                                                                                                                                                                                                                                                                                                                                                             |
| LYZ      | LYZC; LYZF1            | Lysozyme C,Lysozyme C;Lysozyme,Lysozyme,Lysozyme                                                                                                                                                                                                                                                                                                                                                                                                                                                                                                                                                                                                                                                                                                                                                                                                                                                                                                                                                                                                                                                                                                                                                                                                                                                                                                                                                                                                                                                                                                                                                                                                                                                                                                                                                                                      |
| MAGT1    |                        | Magnesium transporter protein 1,Magnesium transporter protein 1;cDNA FLJ56344, highly                                                                                                                                                                                                                                                                                                                                                                                                                                                                                                                                                                                                                                                                                                                                                                                                                                                                                                                                                                                                                                                                                                                                                                                                                                                                                                                                                                                                                                                                                                                                                                                                                                                                                                                                                 |

|          |                      |                                                                                                                                                                                                                                                                                                                                                                                                                                                                                                                                                                                                                                                                                                                                                                                                                                 |
|----------|----------------------|---------------------------------------------------------------------------------------------------------------------------------------------------------------------------------------------------------------------------------------------------------------------------------------------------------------------------------------------------------------------------------------------------------------------------------------------------------------------------------------------------------------------------------------------------------------------------------------------------------------------------------------------------------------------------------------------------------------------------------------------------------------------------------------------------------------------------------|
|          |                      | similar to Implantation-associated protein                                                                                                                                                                                                                                                                                                                                                                                                                                                                                                                                                                                                                                                                                                                                                                                      |
| APOOL    |                      | MICOS complex subunit MIC27,MICOS complex subunit MIC27,MICOS complex subunit MIC27;Putative uncharacterized protein DKFZp779P1227                                                                                                                                                                                                                                                                                                                                                                                                                                                                                                                                                                                                                                                                                              |
| MLEC     |                      | Malectin,Malectin;Malectin (Fragment),Malectin (Fragment)                                                                                                                                                                                                                                                                                                                                                                                                                                                                                                                                                                                                                                                                                                                                                                       |
| MPI      |                      | Mannose-6-phosphate isomerase,Mannose-6-phosphate isomerase (Fragment),Mannose-6-phosphate isomerase (Fragment);cDNA FLJ56688, highly similar to Mannose-6-phosphate isomerase (EC 5.3.1.8);Mannose phosphate isomerase isoform |
| MYLK     |                      | Myosin light chain kinase, smooth muscle,Myosin light chain kinase, smooth muscle                                                                                                                                                                                                                                                                                                                                                                                                                                                                                                                                                                                                                                                                                                                                               |
| PPP1R12A | PPP1R12B             | Protein phosphatase 1 regulatory subunit 12A;Protein phosphatase 1 regulatory subunit,Protein phosphatase 1 regulatory subunit 12A (Fragment),Protein phosphatase 1 regulatory subunit 12A (Fragment)      |
| NADSYN1  |                      | Glutamine-dependent NAD(+) synthetase,Glutamine-dependent NAD(+) synthetase,Glutamine-dependent NAD(+) synthetase,Glutamine-dependent NAD(+) synthetase (Fragment),Glutamine-dependent NAD(+) synthetase (Fragment),Glutamine-dependent NAD(+) synthetase (Fragment),Glutamine-dependent NAD(+) synthetase (Fragment),Glutamine-dependent NAD(+) synthetase (Fragment)                                                                                                                                                                                                                                                                                                                                                                                                                                                          |
| NAF1     |                      | H/ACA ribonucleoprotein complex non-core subunit NAF1                                                                                                                                                                                                                                                                                                                                                                                                                                                                                                                                                                                                                                                                                                                                                                           |
| NCAM2    |                      | Neural cell adhesion molecule 2,Neural cell adhesion molecule 2;Neural cell adhesion molecule 2, isoform CRA_a (Fragment);cDNA FLJ54289, highly similar to Neural cell adhesion molecule 2                                                                                                                                                                                                                                                                                                                                                                                                                                                                                                                                                                                                                                      |
| NDRG3    |                      | Protein NDRG3,Protein NDRG3;NDRG family member 3, isoform CRA_c;cDNA FLJ54521, highly similar to Protein NDRG3;NDRG3 protein;cDNA FLJ52497, highly similar to Protein NDRG3                                                                                                                                                                                                                                                                                                                                                                                                                                                                                                                                                                                                                                                     |
| APOA1BP  |                      | NAD(P)H-hydrate epimerase,NAD(P)H-hydrate epimerase,NAD(P)H-hydrate epimerase;cDNA FLJ56357, highly similar to Homo sapiens apolipoprotein A-I binding protein (APOA1BP), mRNA                                                                                                                                                                                                                                                                                                                                                                                                                                                                                                                                                                                                                                                  |
| NOPI4    |                      | Nucleolar protein 14,Nucleolar protein 14;cDNA FLJ76065                                                                                                                                                                                                                                                                                                                                                                                                                                                                                                                                                                                                                                                                                                                                                                         |
| NAP1L1   |                      | Nucleosome assembly protein 1-like 1,Nucleosome assembly protein 1-like 1;Nucleosome assembly protein 1-like 1 (Fragment),Nucleosome assembly protein 1-like 1 (Fragment)                                                              |
| ORC3     |                      | Origin recognition complex subunit 3;cDNA FLJ54334, highly similar to Origin recognition complex subunit 3                                                                                                                                                                                                                                                                                                                                                                                                                                                                                                                                                                                                                                                                                                                      |
| SMEK1    | PPP4R3A;<br>KIAA2010 | Serine/threonine-protein phosphatase 4 regulatory subunit 3A,Serine/threonine-protein phosphatase 4 regulatory subunit 3A;KIAA2010, isoform CRA_a                                                                                                                                                                                                                                                                                                                                                                                                                                                                                                                                                                                                                                                                               |
| PAPOLA   |                      | Poly(A) polymerase alpha,Poly(A) polymerase alpha,Poly(A) polymerase alpha,Poly(A) polymerase alpha;Poly(A) polymerase alpha, isoform CRA_a;Poly(A) polymerase alpha (Fragment),Poly(A) polymerase alpha (Fragment);cDNA FLJ60112, highly similar to Poly(A) polymerase alpha (EC 2.7.7.19);cDNA FLJ56176, highly similar to Poly(A) polymerase alpha (EC 2.7.7.19)                                                                                                                                                                                                                                                                                                             |
| PCYT2    |                      | Ethanolamine-phosphate cytidylyltransferase,Ethanolamine-phosphate cytidylyltransferase,Ethanolamine-phosphate cytidylyltransferase;Ethanolamine-phosphate cytidylyltransferase (Fragment),Ethanolamine-phosphate cytidylyltransferase                                                                                                                                                                                                                                                                                                                                                                                                                                                                                                                                                                                          |

|          |                         |                                                                                                                                                                                                                                                                                                                                                                                                                           |
|----------|-------------------------|---------------------------------------------------------------------------------------------------------------------------------------------------------------------------------------------------------------------------------------------------------------------------------------------------------------------------------------------------------------------------------------------------------------------------|
|          |                         | (Fragment),Ethanolamine-phosphate cytidyltransferase (Fragment),Ethanolamine-phosphate cytidyltransferase (Fragment),Ethanolamine-phosphate cytidyltransferase (Fragment),Ethanolamine-phosphate cytidyltransferase (Fragment)                                                                                                                                                                                            |
| PFKP     |                         | ATP-dependent 6-phosphofructokinase, platelet type,ATP-dependent 6-phosphofructokinase, platelet type                                                                                                                                                                                                                                                                                                                     |
| PGK1     | HEL-S-68p;<br>HEL-S-272 | Phosphoglycerate kinase 1;Phosphoglycerate kinase,Phosphoglycerate kinase,Phosphoglycerate kinase,Phosphoglycerate kinase,Phosphoglycerate kinase                                                                                                                                                                                                                                                                         |
| PLG      |                         | Plasminogen                                                                                                                                                                                                                                                                                                                                                                                                               |
| PLOD1    |                         | Procollagen-lysine,2-oxoglutarate 5-dioxygenase 1;Procollagen-lysine 1, 2-oxoglutarate 5-dioxygenase 1, isoform CRA_a;cDNA FLJ53377, highly similar to Procollagen-lysine, 2-oxoglutarate 5-dioxygenase 1 (EC 1.14.11.4);cDNA, FLJ92537, highly similar to Homo sapiens procollagen-lysine, 2-oxoglutarate 5-dioxygenase (lysine hydroxylase, Ehlers-Danlos syndrome type VI) (PLOD), mRNA                                |
| PRTN3    |                         | Myeloblastin                                                                                                                                                                                                                                                                                                                                                                                                              |
| HNRPU    |                         | Heterogeneous nuclear ribonucleoprotein U (Scaffold attachment factor A), isoform CRA_a                                                                                                                                                                                                                                                                                                                                   |
| RASSF2   |                         | Ras association domain-containing protein 2                                                                                                                                                                                                                                                                                                                                                                               |
| SCPEP1   |                         | Retinoid-inducible serine carboxypeptidase,Retinoid-inducible serine carboxypeptidase,Retinoid-inducible serine carboxypeptidase;cDNA FLJ55993, highly similar to Retinoid-inducible serine carboxypeptidase (EC 3.4.16.-)                                                                                                                                                                                                |
| MRPL23   |                         | 39S ribosomal protein L23, mitochondrial,39S ribosomal protein L23, mitochondrial,39S ribosomal protein L23, mitochondrial,39S ribosomal protein L23, mitochondrial;39S ribosomal protein L23, mitochondrial (Fragment);Mitochondrial ribosomal protein L23, isoform CRA_a;cDNA, FLJ94423, highly similar to Homo sapiens mitochondrial ribosomal protein L23 (MRPL23), nuclear gene encoding mitochondrial protein, mRNA |
| RPN2     |                         | Dolichyl-diphosphooligosaccharide--protein glycosyltransferase subunit 2                                                                                                                                                                                                                                                                                                                                                  |
| DAP3     |                         | 28S ribosomal protein S29, mitochondrial,28S ribosomal protein S29, mitochondrial                                                                                                                                                                                                                                                                                                                                         |
| S100A4   |                         | Protein S100-A4                                                                                                                                                                                                                                                                                                                                                                                                           |
| SCFD1    |                         | Sec1 family domain-containing protein 1,Sec1 family domain-containing protein 1;Vesicle transport-related protein isoform a variant (Fragment)                                                                    |
| BNIP1    |                         | Vesicle transport protein SEC20                                                                                                                                                                                                                                                                                                                                                                                           |
| SH3KBP1  |                         | SH3 domain-containing kinase-binding protein 1,SH3 domain-containing kinase-binding protein 1;GIG10                                                                                                                                                                                                                                                                                                                       |
| SH3GLB1  |                         | Endophilin-B1                                                                                                                                                                                                                                                                                                                                                                                                             |
| NANS     |                         | Sialic acid synthase                                                                                                                                                                                                                                                                                                                                                                                                      |
| SLK      |                         | STE20-like serine/threonine-protein kinase                                                                                                                                                                                                                                                                                                                                                                                |
| SEPHS1   |                         | Selenide, water dikinase 1                                                                                                                                                                                                                                                                                                                                                                                                |
| STX6     |                         | Syntaxin-6                                                                                                                                                                                                                                                                                                                                                                                                                |
| STX7     |                         | Syntaxin-7                                                                                                                                                                                                                                                                                                                                                                                                                |
| SYNE1    |                         | Nesprin-1                                                                                                                                                                                                                                                                                                                                                                                                                 |
| TUBG1    |                         | Tubulin gamma-1 chain                                                                                                                                                                                                                                                                                                                                                                                                     |
| TTC4     |                         | Tetratricopeptide repeat protein 4                                                                                                                                                                                                                                                                                                                                                                                        |
| TTC5     |                         | Tetratricopeptide repeat protein 5                                                                                                                                                                                                                                                                                                                                                                                        |
| TMSB4X   |                         | Thymosin beta-4;Thymosin beta 4, X-linked;TMSB4X protein (Fragment),TMSB4X protein (Fragment),TMSB4X protein (Fragment),TMSB4X protein (Fragment),TMSB4X protein (Fragment)                                                                                                                                                                                                                                               |
| HEL-S-26 |                         | Isocitrate dehydrogenase [NADP]                                                                                                                                                                                                                                                                                                                                                                                           |
| KIAA1033 |                         | WASH complex subunit 7,WASH complex subunit 7,WASH complex subunit 7,WASH complex subunit 7;KIAA1033 protein;WASH complex subunit 7 (Fragment),WASH complex subunit 7 (Fragment),WASH complex subunit 7 (Fragment)                                                                                                                                                                                                        |
| WBP2     |                         | WW domain-binding protein 2,WW domain-binding protein 2 (Fragment),WW domain-binding protein 2 (Fragment),WW domain-binding protein 2 (Fragment),WW domain-binding protein 2 (Fragment);WW-domain binding protein 2                               |
| XPO4     |                         | Exportin-4,Exportin-4;Exportin 4                                                                                                                                                                                                                                                                                                                                                                                          |
| ZNF622   |                         | Zinc finger protein 622                                                                                                                                                                                                                                                                                                                                                                                                   |
| ZNF841   |                         | Zinc finger protein 841;Zinc finger protein 841 (Fragment),Zinc finger protein 841 (Fragment)                                                                                                                                                                                                                                                                                                                             |

**Supplementary Table S2.** List of the m/z recorded for each isotopomer of different fatty acids studied by GC-MS.

|                             | <b>C14:0</b> | <b>C16:1</b> | <b>C16:0</b> | <b>C18:1</b> | <b>C18:0</b> | <b>C20:4</b> |
|-----------------------------|--------------|--------------|--------------|--------------|--------------|--------------|
| <b>Retention Time (min)</b> | 12.29        | 14.16        | 14.36        | 16.06        | 16.28        | 17.39        |
| <b>M0</b>                   | 227,3        | 253,3        | 255,3        | 281,3        | 283,3        | 303,3        |
| <b>M+1</b>                  | 228,3        | 254,3        | 256,3        | 282,3        | 284,3        | 304,3        |
| <b>M+2</b>                  | 229,3        | 255,3        | 257,3        | 283,3        | 285,3        | 305,3        |
| <b>M+3</b>                  | 230,3        | 256,3        | 258,3        | 284,3        | 286,3        | 306,3        |
| <b>M+4</b>                  | 231,3        | 257,3        | 259,3        | 285,3        | 287,3        | 307,3        |
| <b>M+5</b>                  | 232,3        | 258,3        | 260,3        | 286,3        | 288,3        | 308,3        |
| <b>M+6</b>                  | 233,3        | 259,3        | 261,3        | 287,3        | 289,3        | 309,3        |
| <b>M+7</b>                  | 234,3        | 260,3        | 262,3        | 288,3        | 290,3        | 310,3        |
| <b>M+8</b>                  | 235,3        | 261,3        | 263,3        | 289,3        | 291,3        | 311,3        |
| <b>M+9</b>                  | 236,3        | 262,3        | 264,3        | 290,3        | 292,3        | 312,3        |
| <b>M+10</b>                 | 237,3        | 263,3        | 265,3        | 291,3        | 293,3        | 313,3        |
| <b>M+11</b>                 | 238,3        | 264,3        | 266,3        | 292,3        | 294,3        | 314,3        |
| <b>M+12</b>                 | 239,3        | 265,3        | 267,3        | 293,3        | 295,3        | 315,3        |
| <b>M+13</b>                 | 240,3        | 266,3        | 268,3        | 294,3        | 296,3        | 316,3        |
| <b>M+14</b>                 | 241,3        | 267,3        | 269,3        | 295,3        | 297,3        | 317,3        |
| <b>M+15</b>                 |              | 268,3        | 270,3        | 296,3        | 298,3        | 318,3        |
| <b>M+16</b>                 |              | 269,3        | 271,3        | 297,3        | 299,3        | 319,3        |
| <b>M+17</b>                 |              |              |              | 298,3        | 300,3        | 320,3        |
| <b>M+18</b>                 |              |              |              | 299,3        | 301,3        | 321,3        |
| <b>M+19</b>                 |              |              |              |              |              | 322,3        |
| <b>M+20</b>                 |              |              |              |              |              | 323,3        |

**Supplementary Figure S1.** Detail of relative quantification of molecular species obtained by LC-MS for PI (A) and for ceramides (B).

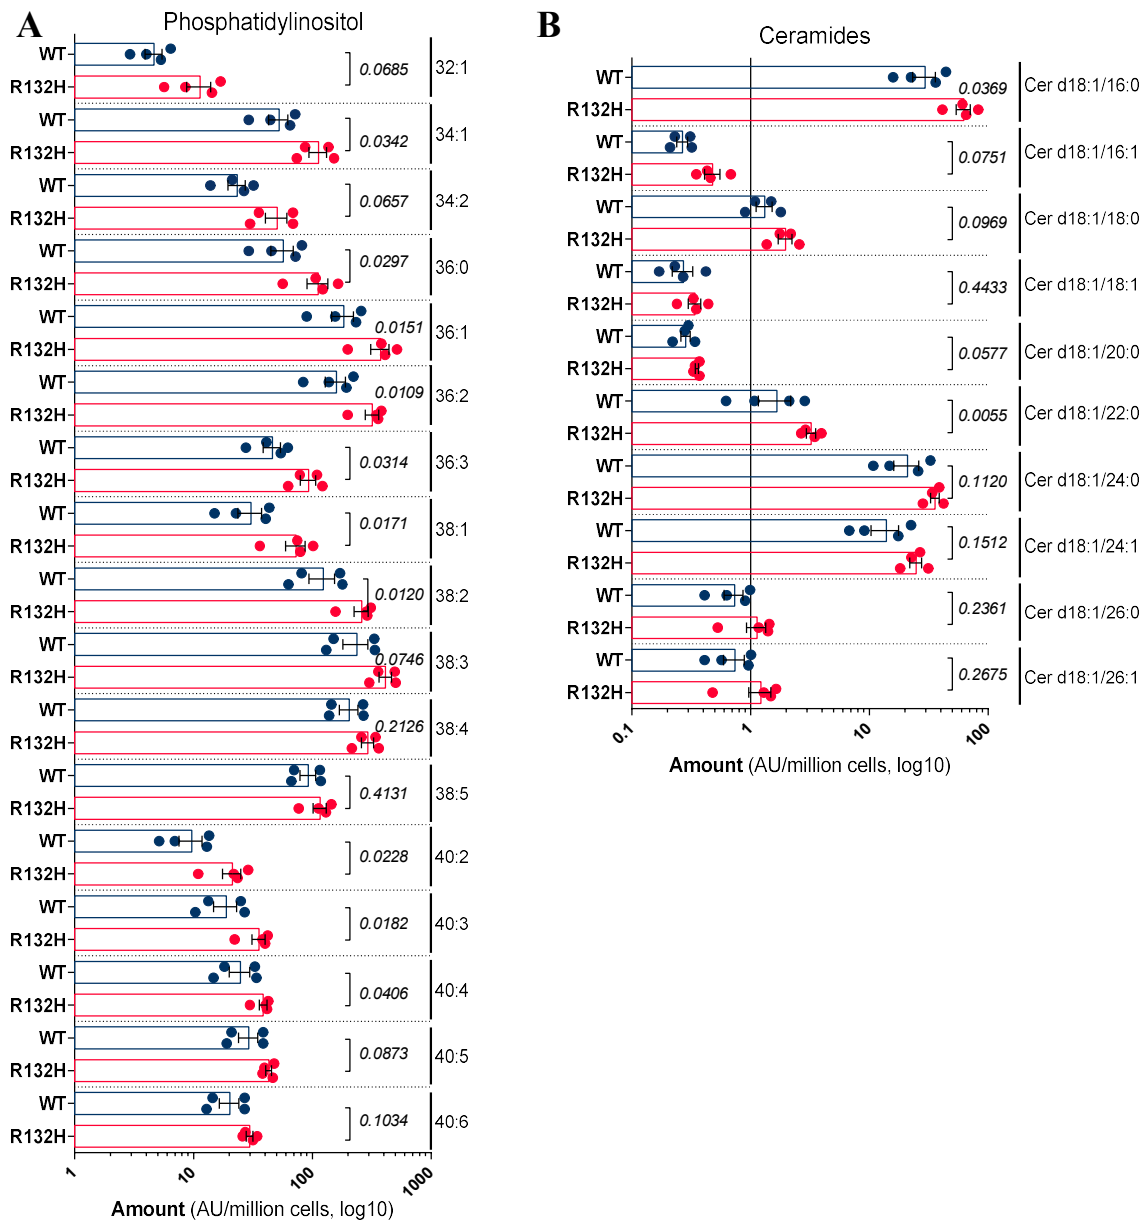

Supplement: ijms-19-03325-s001.pdf [file ijms-19-03325-s001.pdf]
